# Supplementary material
Source: PubMed Central journal article supplement (PMC1559750)
Supplement: pnas_0601149103_7.pdf [file pnas_0601149103_7.pdf]

Table 4. Crystallographic data collection and model refinement statistics.

|                                                    | Myxothiazol*               | Azoxystrobin  | MOAS          | Native        | Stigmatellin  | UHDBT1        | Famoxadone    | JG144 <sup>†</sup> | Rsbcl         |
|----------------------------------------------------|----------------------------|---------------|---------------|---------------|---------------|---------------|---------------|--------------------|---------------|
| <i>Data collection</i>                             |                            |               |               |               |               |               |               |                    |               |
| Resolution (Å)                                     | 50-2.7                     | 40-2.64       | 50-3.0        | 50-2.4        | 50-2.5        | 50-2.85       | 50-2.20       | 40-2.26            | 50-3.2        |
| (outer shell)                                      | (2.80-2.70)                | (2.73-2.64)   | (3.11-3.00)   | (2.49-2.40)   | (2.59-2.50)   | (2.95-2.85)   | (2.25-2.20)   | (2.34-2.26)        | (3.11-3.20)   |
| R <sub>merge</sub> <sup>‡</sup>                    | 0.066 (0.433) <sup>§</sup> | 0.073 (0.434) | 0.058 (0.384) | 0.058 (0.392) | 0.068 (0.449) | 0.072 (0.436) | 0.064 (0.431) | 0.064 (0.477)      | 0.137 (0.480) |
| <I>/<I <sub>h</sub> >                              | 15.8 (1.33)                | 14.1 (2.15)   | 21.9 (2.38)   | 17.7 (1.76)   | 24.1 (1.77)   | 17.1 (1.14)   | 17.9 (5.25)   | 23.4 (1.11)        | 10.2 (2.2)    |
| Completeness (%)                                   | 91.8 (90.7)                | 95.1 (85.9)   | 95.5 (94.7)   | 85.7 (77.8)   | 94.7 (89.4)   | 85.4 (20.6)   | 86.7 (70.5)   | 96.9 (87.3)        | 99.6 (99.4)   |
| Ano. R <sub>merge</sub>                            | 0.060 (0.382)              | 0.068 (0.334) | 0.049 (0.338) | 0.055 (0.366) | 0.062 (0.389) | 0.065 (0.397) | 0.060 (0.396) | 0.062 (0.419)      | -             |
| Ano. completeness(%)                               | 86.3 (79.2)                | 89.5 (72.7)   | 91.8 (85.3)   | 77.4 (61.5)   | 89.3 (78.5)   | 81.4 (13.0)   | 78.8 (56.9)   | 93.8 (75.7)        | -             |
| No. unique reflections                             | 90,291                     | 99,945        | 69,377        | 119,745       | 117,666       | 70,581        | 155,226       | 160,625            | 135,428       |
| No. free reflections                               | 2,776                      | 2,866         | 2,112         | 3,584         | 3,133         | 2,124         | 2,461         | 3,230              | 2,102         |
| Wavelength (Å)                                     | 1.0                        | 0.92          | 1.736         | 0.97          | 1.0           | 1.2           | 1.0           | 0.97               | 1.0           |
| <i>Model refinement</i>                            |                            |               |               |               |               |               |               |                    |               |
| R <sub>work</sub> /R <sub>free</sub>               | 0.245/0.297                | 0.223/0.270   | 0.259/0.307   | 0.232/0.282   | 0.238/0.281   | 0.216/0.279   | 0.239/0.290   | 0.244/0.282        | 0.224/0.254   |
| R <sub>work</sub> /R <sub>free</sub> (outer shell) | 0.32/0.38                  | 0.35/0.36     | 0.28/0.37     | 0.48/0.49     | 0.28/0.34     | 0.29/0.38     | 0.38/0.37     | 0.31/0.31          | 0.325/0.347   |
| No. atoms                                          | 17,125                     | 7,131         | 17,233        | 17,454        | 17,064        | 17,371        | 17,497        | 17,304             | 41,688        |
| No. res. (% compl.) <sup>¶</sup>                   | 2,081 (96.0)               | 2,078 (95.9)  | 2,104 (97.1)  | 2,099 (96.9)  | 2,101 (97.0)  | 2,110 (97.4)  | 2,111 (97.4)  | 2,110 (97.4)       | 5,178 (90.2)  |
| No. co-factors                                     | 5                          | 5             | 5             | 4             | 5             | 5             | 5             | 5                  | 30            |
| No. sol. mol. <sup>  </sup>                        | 237                        | 243           | 189           | 454           | 298           | 322           | 567           | 271                | 0             |
| r.m.s.d. bond length (Å)                           | 0.021                      | 0.018         | 0.029         | 0.015         | 0.021         | 0.015         | 0.018         | 0.022              | 0.013         |
| r.m.s.d. bond angle (°)                            | 2.0                        | 1.7           | 2.2           | 1.9           | 2.0           | 2.0           | 1.8           | 2.1                | 1.7           |
| DPI (Å)**                                          | 0.361                      | 0.322         | 0.454         | 0.279         | 0.304         | 0.424         | 0.254         | 0.215              | N/A           |

\* Statistics for all data sets were computed at  $-1\sigma$  cutoff for reflection intensity; space group symmetry for all crystals is  $I4_122$ .

<sup>†</sup> The chemical structure of JG144 is S-3-anilino-5-methyl-5-(4,6-difluorophenyl)-1,3-oxazolidine-2,4-dione.

<sup>‡</sup> R<sub>merge</sub> is defined as  $\sum |I_{h,i} - \langle I_h \rangle| / \sum I_{h,i}$ , where  $I_{h,i}$  is the intensity for  $i$ th observation of a reflection with Miller index  $h$ , and  $\langle I_h \rangle$  is the mean intensity for all measured  $I_{h,s}$  and Friedel pairs.

<sup>§</sup> Values in parentheses are for the highest-resolution shells.

<sup>¶</sup> No. of residues in the model and percentage of completeness.

<sup>||</sup> No. of solvent of molecules in the model.

\*\* Diffraction-component precision index (S9).
