# Supplementary material
Source: PubMed Central journal article supplement (PMC1559750)

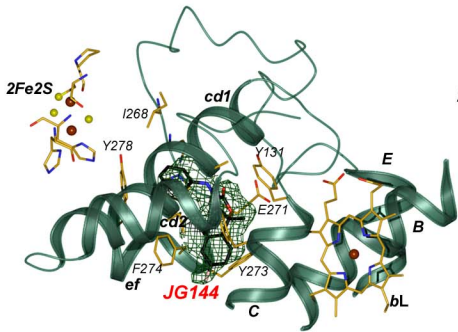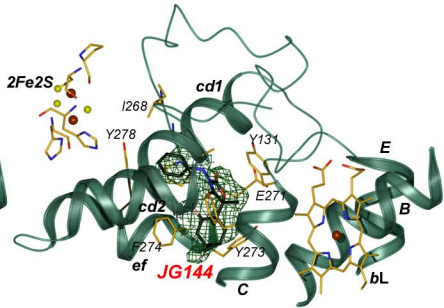

Supplement: pnas_0601149103_1.pdf [file pnas_0601149103_1.pdf]

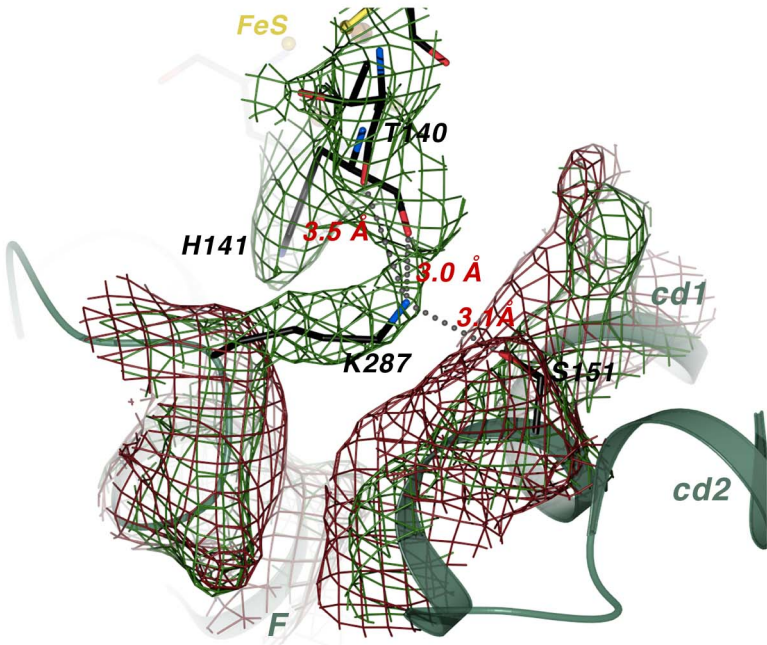

Supplement: pnas_0601149103_2.pdf [file pnas_0601149103_2.pdf]

**A**

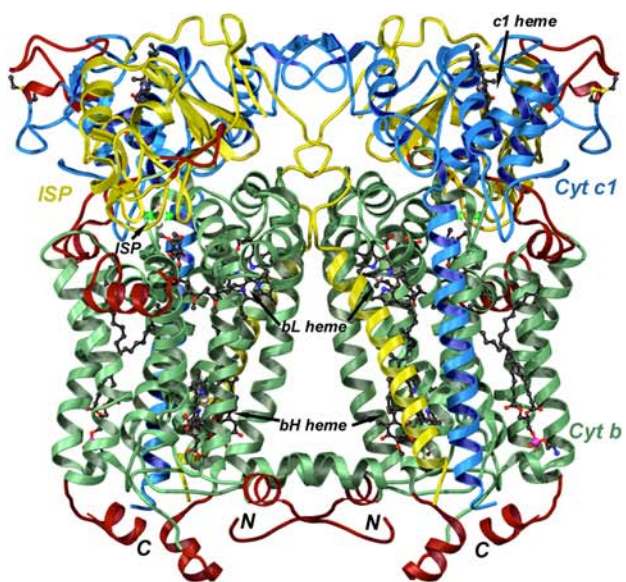

**B**

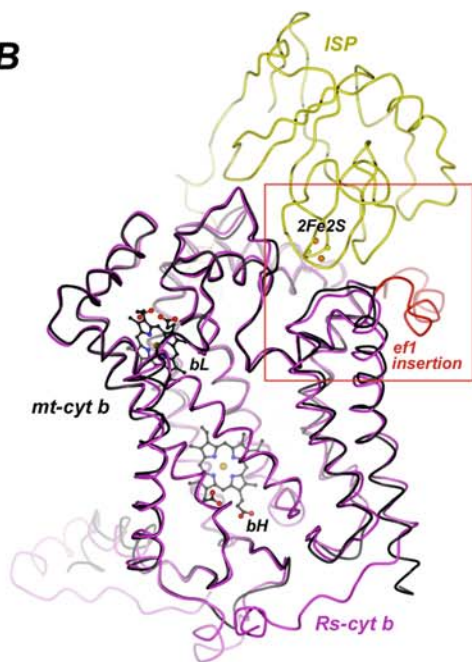

**C**

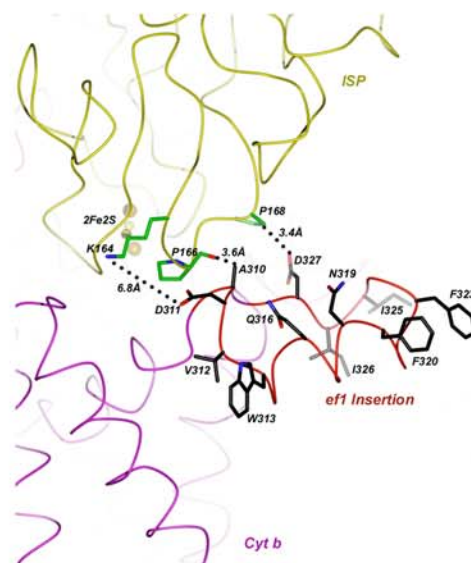

Supplement: pnas_0601149103_3.pdf [file pnas_0601149103_3.pdf]

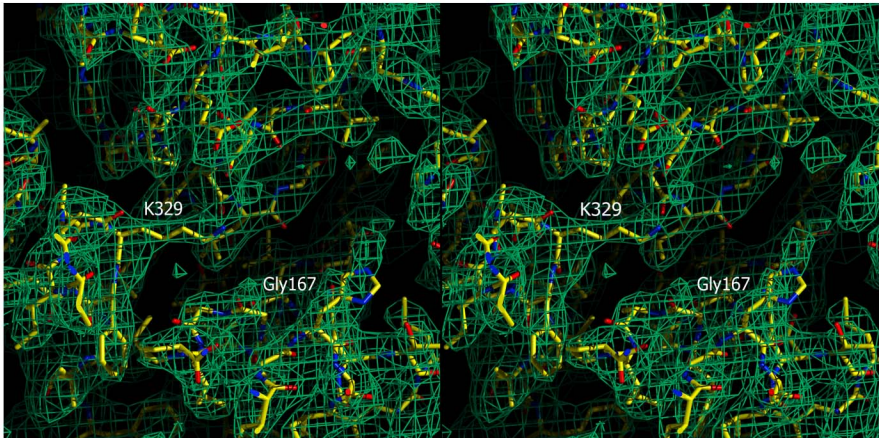

Supplement: pnas_0601149103_4.pdf [file pnas_0601149103_4.pdf]
